1 **Genome-wide identification of novel sRNAs in *Streptococcus mutans***

2 Madeline C Krieger<sup>1,2</sup>, Justin Merritt<sup>2</sup>, Rahul Raghavan<sup>1,3</sup>

3

4 <sup>1</sup>Department of Biology, Portland State University, Portland, OR, USA.

5 <sup>2</sup>Department of Restorative Dentistry, School of Dentistry, Oregon Health and Science  
6 University, Portland, OR, USA.

7 <sup>3</sup>Department of Molecular Microbiology and Immunology, The University of Texas at San  
8 Antonio, San Antonio, TX, USA.

9

10 Author for correspondence:

11 Rahul Raghavan | Email: [rahul.raghavan@utsa.edu](mailto:rahul.raghavan@utsa.edu)

12

13 **Key words:** sRNA, *Streptococcus mutans*, 6S RNA, sugar-phosphate stress, sorbitol,  
14 transcriptome

15

16

17

18

19

20

21

22

23

24 **ABSTRACT**

25 *Streptococcus mutans* is a major pathobiont involved in the development of dental caries. Its  
26 ability to utilize numerous sugars and to effectively respond to environmental stress promotes *S.*  
27 *mutans* proliferation in oral biofilms. Because of their quick action and low energetic cost, non-  
28 coding small RNAs (sRNAs) represent an ideal mode of gene regulation in stress response  
29 networks, yet their roles in oral pathogens have remained largely unexplored. We identified 15  
30 novel sRNAs in *S. mutans* and show that they respond to four stress-inducing conditions  
31 commonly encountered by the pathogen in human mouth: sugar-phosphate stress, hydrogen  
32 peroxide exposure, high temperature, and low pH. To better understand the role of sRNAs in *S.*  
33 *mutans*, we further explored the function of the novel sRNA, SmsR4. Our data demonstrate that  
34 SmsR4 regulates the EIIA component of the sorbitol phosphotransferase system, which  
35 transports and phosphorylates the sugar alcohol sorbitol. The fine-tuning of EIIA availability by  
36 SmsR4 likely promotes *S. mutans* growth while using sorbitol as the main carbon source. Our  
37 work lays a foundation for understanding the role of sRNAs in regulating gene expression in  
38 stress response networks in *S. mutans* and highlights the importance of the underexplored  
39 phenomenon of posttranscriptional gene regulation in oral bacteria.

40

41 **IMPORTANCE**

42 Small RNAs (sRNAs) are important gene regulators in bacteria, but the identities and functions  
43 of sRNAs in *Streptococcus mutans*, the principal bacterium involved in the formation of dental  
44 caries, are unknown. In this study, we identified 15 putative sRNAs in *S. mutans* and show that  
45 they respond to four common stress-inducing conditions present in human mouth: sugar-  
46 phosphate stress, hydrogen peroxide exposure, high temperature, and low pH. We further show  
47 that the novel sRNA SmsR4 likely modulates sorbitol transport into the cell by regulating  
48 SMU\_313 mRNA, which encodes the EIIA subunit of the sorbitol phosphotransferase system.  
49 Gaining a better understanding of sRNA-based gene regulation may provide new opportunities to  
50 develop specific inhibitors of *S. mutans* growth, thereby improving oral health.

51

## 52 INTRODUCTION

53 The gram-positive oral pathogen *Streptococcus mutans* plays a principal role in the formation of  
54 dental caries and is often considered to be the primary causative agent of the disease (1–3).

55 Central to *S. mutans* cariogenicity is its ability to ferment a wide variety of sugars, resulting in  
56 the formation of acidic microenvironments that drive the decline of commensal species and the  
57 proliferation of aciduric bacteria (4). One factor that allows *S. mutans* to metabolize a variety of  
58 carbon sources is the presence of 14 phosphotransferase systems (PTSs) (5, 6). PTSs act by  
59 transporting carbohydrates across the cell membrane and immediately phosphorylating them for  
60 intracellular retention and entry into glycolysis (7). While glucose is the preferred carbon source  
61 for *S. mutans*, other PTSs, including the sorbitol (glucitol) PTS, are inducible in its absence.  
62 Sorbitol is a sugar-alcohol found naturally in many fruits and is a popular low-calorie anti-  
63 cariogenic sweetener (7, 8). The anticariogenic action of sorbitol is due to the relatively low  
64 amounts of acid produced during sorbitol fermentation by *S. mutans* compared to that of glucose  
65 or sucrose metabolism (8, 9).

66 The success of *S. mutans* in the oral cavity is enhanced not only by proficient sugar  
67 utilization but also by its ability to quickly respond to rapidly changing environmental conditions  
68 and multiple stressors (10). Small RNAs (sRNAs) are non-coding transcripts that typically bind  
69 to their target mRNAs to regulate gene expression (11). Due to their low energetic cost, fast  
70 action, and capacity for co-degradation with mRNA targets, sRNAs are an ideal mode of  
71 posttranscriptional control when a bacterium is experiencing environmental stress (12).  
72 Surprisingly little is known about sRNA-based regulation in *S. mutans* and there have been no  
73 functional analyses of sRNA utility in *S. mutans* to date. In this study, we identified 15 putative

74 sRNAs in *S. mutans* that respond to multiple stress conditions and describe a novel sRNA that  
75 promotes bacterial growth in the presence of sorbitol.

76

## 77 **RESULTS**

### 78 **Identification and validation of novel sRNAs**

79 We used an RNA-seq-based approach that we developed previously (13–15) to identify 15 novel  
80 sRNAs — named SmsR for “*S. mutans* small RNA” — expressed in *S. mutans* during  
81 exponential (OD<sub>600</sub> 0.5-0.6) growth in Brain Heart Infusion (BHI) broth (**Figure 1**). Nine of the  
82 novel sRNAs overlapped with candidates predicted by a previous genome-wide scan and a  
83 search against the Rfam database identified three of the sRNAs as RNase P, 6S RNA, and  
84 tmRNA (16, 17) (**Table 1**). All candidate sRNAs have putative -10 promoter sites, and 10 have  
85 predicted rho-independent terminators at their 3' ends (**Table 2**), indicating these as authentic  
86 sRNAs. We further verified all 15 putative sRNA transcripts using Northern blot (**Figure 1**).  
87 Interestingly, in a few cases, higher molecular weight bands in addition to the sRNAs were  
88 observed, presumably because the sRNAs were cleaved from longer transcripts, as observed in  
89 other bacteria (18–23).

90

### 91 **sRNAs respond to environmental stress**

92 We evaluated the expression of the 15 novel sRNAs following *S. mutans* exposure to four stress-  
93 inducing conditions relevant to the human oral cavity: sugar-phosphate stress, hydrogen peroxide  
94 (H<sub>2</sub>O<sub>2</sub>), high temperature, and low pH (**Table 3**). All sRNAs showed patterns of differential  
95 expression in at least one of these conditions, suggesting likely roles in stress tolerance networks  
96 (**Figure 2**). Acid and sugar-phosphate stress induced differential expression of 12 sRNAs, while

97 eight sRNAs were affected by heat stress and four responded to oxidative stress (**Figure 2**).  
98 Upregulation of sRNA expression was more common than downregulation across all conditions  
99 except for heat stress.

100

#### 101 **SmsR14 and SmsR4 are unrelated sRNAs**

102 6S RNA, a global regulator of transcription, is widely conserved among bacteria (24–26). Two  
103 copies of 6S RNA are present in *Bacillus subtilis*, a model gram-positive bacterium: one in the  
104 intergenic region between genes for azoreductase and RecQ helicase, and the other between two  
105 tRNA-associated genes (**Figure 3**) (27). The prevalence of 6S RNA in *Streptococcus* has not  
106 been examined previously. SmsR14, one of the newly-discovered sRNAs, is a 6S homolog and is  
107 located between *rarA* and tRNA-Lys genes in *S. mutans* (**Figure 3**). A covariance modeling  
108 (cm)-based search for 6S homologs in other *Streptococcus* species revealed only one copy of the  
109 sRNA in all genomes we analyzed (**Figure 4**). Interestingly, another novel sRNA (SmsR4)  
110 occupies the genomic location at which 6S RNA is present in *Escherichia coli*, i.e., upstream of  
111 the gene encoding 5-formyltetrahydrofolate cyclo-ligase (5-FTC) (**Figure 3**) (24, 26, 28).  
112 SmsR4, however, is much shorter than 6S (110 nt vs 194 nt), has a predicted secondary structure  
113 that is distinct from that of 6S, and is encoded on the opposite strand as 5-FTC gene (**Figure 3**).  
114 These differences suggest that SmsR4 is unrelated to 6S RNA and could have distinct functions  
115 in *S. mutans*.

116

#### 117 **SmsR4 arose in the Pyogenes-Equinus-Mutans clade of *Streptococcus***

118 The genus *Streptococcus* could broadly be classified into two clades: Mitis-Suis and Pyogenes-  
119 Equinus-Mutans (29). Our cm-based search identified SmsR4 homologs only in the Pyogenes-

120 Equinus-Mutans clade (**Figure 4**). Further, an evolutionary reconstruction showed that SmsR4  
121 arose at the root of this clade but was later lost in the common ancestor of Sobrinus, Salivarius,  
122 Halotolerans and Porci subclades. While the rest of the Pyogenes subclade members contain  
123 SmsR4, it is absent in *Streptococcus equi*; similarly, in Entericus subclade, *Streptococcus*  
124 *marimmalium* has lost the sRNA, but it is retained by *Streptococcus entericus*. Despite these  
125 disparate cases of sRNA loss, the broad pattern of conservation of SmsR4 across a major clade  
126 of *Streptococcus* suggests that the novel sRNA has important functions.

127

### 128 **SmsR4 promotes *S. mutans* growth in sorbitol-containing media**

129 To identify the functions of SmsR4 in *S. mutans*, we first confirmed the 5' and 3' boundaries of  
130 SmsR4 and generated an SmsR4-deletion (DEL) strain. We measured the growth of wild-type  
131 (WT) and DEL strains using a phenotypic microarray (30). In this analysis, DEL had reduced  
132 growth in comparison to WT in media containing sorbitol as the sole carbon source (**Figure S1**).  
133 We verified this phenotype by measuring bacterial growth in BTR medium that contained either  
134 0.5% glucose (BTR-G) or 0.5% sorbitol (BTR-S). In this assay DEL had weaker growth than  
135 WT in BTR-S despite displaying a growth pattern identical to that of WT in BTR-G (**Figure 5**).  
136 The growth defect of DEL in BTR-S was overcome by a complementation strain (COMP) in  
137 which SmsR4 was expressed on the shuttle vector pDL278 (31, 32), indicating that the loss of  
138 SmsR4 caused DEL's reduced growth. Probably because multiple copies of the SmsR4-carrying  
139 plasmid were present in each cell, COMP grew considerably better than WT in BTR-S, again  
140 denoting a role for the sRNA in promoting robust bacterial growth when using sorbitol as the  
141 carbon source.

142

## 143 **SmsR4 regulates the EIIA component of the sorbitol PTS**

144 In accordance with SmsR4's potential role in regulating bacterial growth on sorbitol, *in silico*  
145 sRNA target prediction indicated that SmsR4 could bind to SMU\_313, the gene encoding  
146 enzyme IIA of the sorbitol PTS (**Figure 6; Table S1**). An SMU\_313-deletion strain failed to  
147 achieve meaningful growth in BTR-S but grew at comparable levels to WT in BTR-G (**Figure**  
148 **S2**), demonstrating that SMU\_313 is essential for growth on sorbitol but not glucose. We  
149 confirmed the interaction between SmsR4 and SMU\_313 mRNA with an RNA-RNA  
150 electrophoretic mobility shift assay (EMSA), which showed that SmsR4 binds well to the 5'  
151 UTR of SMU\_313 mRNA (**Figure 7A**). The putative-SmsR4-binding site identified by *in silico*  
152 analyses (**Figure 6**) is likely required for this interaction, as a mutation of the predicted SmsR4-  
153 binding site in SMU\_313 inhibited its *in vitro* interaction with SmsR4 (**Figure 7B**). Taken  
154 together, our data indicate that SmsR4 modulates sorbitol import into the cell, likely by  
155 antagonizing translation of SMU\_313 mRNA, which encodes the EIIA subunit of the sorbitol  
156 PTS.

157

## 158 **DISCUSSION**

159 sRNAs are critical for posttranscriptional gene regulation in bacteria, but their roles in the dental  
160 pathogen *S. mutans* have remained largely unknown. Prior to our study, a mostly bioinformatics-  
161 based analysis of gene expression in *S. mutans* grown with various carbon sources identified 243  
162 sRNA candidates (17). In contrast, our approach combined genome-wide analysis with  
163 experimental validation and uncovered 15 sRNAs expressed under a single growth condition  
164 (BHI, OD<sub>600</sub> 0.5-0.6) (**Figure 1**); hence, it is certainly possible that *S. mutans* transcribes  
165 additional undetected sRNAs in growth conditions different from those examined here. We



166 noticed several sRNAs that appeared to be processed from larger parent transcripts, e.g., SmsR3  
167 and SmsR20 (**Figure 1**). The generation of sRNAs from processed mRNAs has been well  
168 documented; for example, OppZ and CarZ are produced by RNase E cleavage of the *oppABCDF*  
169 and *carAB* mRNAs in *Vibrio cholera*, ArgX is produced from *argR* mRNA in *Lactococcus*  
170 *lactis*, and RsaC is formed via RNase III digestion of *mntACB* mRNA in *Staphylococcus aureus*  
171 (20, 33–37). Alternatively, some of these sRNAs may be regulatory elements with multiple  
172 products formed from premature transcriptional termination and transcriptional read-through  
173 (38).

174         The genomic contexts of sRNAs likely have implications for their functions (**Figure 1**).  
175 For instance, some of the sRNAs located in the 5' UTRs of downstream genes (e.g., SmsR5,  
176 SmsR6, SmsSR8, SmsR16, SmsR20, SmsR22) could function as riboswitch-like elements (39),  
177 or sRNAs that are transcribed divergently from downstream protein-coding genes (e.g., SmsR1,  
178 SmsR3, SmsR19) could function as antisense sRNAs that regulate cis-encoded targets (40, 41).  
179 A few sRNA genes in other bacteria have been shown to contain small open reading frames  
180 (ORFs) that encode proteins (42). We searched the 15 sRNA sequences for ORFs and found that  
181 SmsR12 potentially encodes a small protein (33 amino acids). Although we could not detect a  
182 ribosome binding site upstream of the ORF and a BlastP search did not produce any hits in other  
183 bacteria, further studies would be required to determine whether the ORF is indeed functional.  
184 Because sRNAs identified in this study exhibited differential expression under stress and their  
185 existence as discrete transcripts were validated via Northern blot, it is likely that they represent  
186 bona fide sRNAs participating in regulatory networks. Aside from SmsR4, the functions of these  
187 novel sRNAs are currently unknown, but preliminary *in silico* target predictions suggest that  
188 many of them are involved in processes critical to adaptation and virulence. For instance, SmsR2

189 and SmR22 are predicted to bind to PTS components, indicating that additional sRNAs may  
190 regulate sugar transport (**Table S1**), a process critical for *S. mutans* cariogenicity.

191       Among the 15 novel sRNAs, SmsR4 was intriguing because its genomic location is  
192 similar to that of 6S RNA in many proteobacteria (24), and as observed for 6S, SmsR4 was  
193 maximally expressed during the transition from exponential to stationary phase (**Figure S3**) (25).  
194 In gammaproteobacteria, expression of 6S is thought to be controlled by its linkage to the  
195 neighboring 5-FTC gene, which responds to nutrient limitation during the transition to stationary  
196 phase (24). In a similar manner, SMU\_320, the 5-FTC homolog in *S. mutans*, could influence the  
197 expression of SmsR4; however, unlike with 5-FTC and 6S in gram-negative bacteria, SMU\_320  
198 and SmsR4 are encoded on opposite DNA strands and hence are not co-transcribed. Instead, a  
199 unique promoter likely initiates SmsR4 transcription (**Table 2**).

200       Because sugar transport is central to the proliferation and cariogenicity of *S. mutans*, it is  
201 unsurprising to find an sRNA regulator of its sorbitol usage. While further work is required to  
202 delineate the molecular details of its action, our results indicate that SmsR4 likely functions by  
203 modulating translation of the EIIA component of the sorbitol PTS. When sugars are transported  
204 through PTS systems, EIIA (e.g., SMU\_313) participates in phosphorylation of the incoming  
205 sugar molecule as it enters into the cytoplasm (43). If left unchecked, phosphorylated sugars can  
206 accumulate in the cell and trigger sugar-phosphate stress (44). In *E. coli* and *Salmonella enterica*,  
207 the sRNA SgrS plays a key role in restoring glycolytic balance during sugar-phosphate stress by  
208 blocking the translation of mRNAs encoding the corresponding sugar-transporters (45, 46). In a  
209 similar fashion, SmsR4 could be modulating sorbitol intake by regulating the expression of  
210 SMU\_313 (EIIA<sup>sorb</sup>) to relieve *S. mutans* sugar-phosphate stress during the transition from  
211 exponential to stationary phase growth in sorbitol-containing growth medium. Alternatively,

212 modulation of SMU\_313 expression by SmsR4 could impact alternative functions of EIIA. For  
213 example, this protein has been shown to negatively impact glycerol metabolism in *Klebsiella*  
214 *pneumoniae* and to reduce *S. enterica* virulence (47, 48). In conclusion, our *in silico* and  
215 biochemical data both support a role for sRNAs as posttranscriptional regulators of sugar  
216 transport through PTS systems. Further insights into these regulatory mechanisms may provide  
217 new opportunities to develop specific inhibitors of *S. mutans* growth in the oral cavity.

218

## 219 **MATERIALS AND METHODS**

### 220 **Bacterial strains and growth assays**

221 Growth experiments were conducted by diluting overnight cultures of *S. mutans* UA159 in fresh  
222 media. BTR broth base (1% Bacto-Tryptone, 0.1% yeast extract, 0.61% K<sub>2</sub>HPO<sub>4</sub>, 0.2% KH<sub>2</sub>PO<sub>4</sub>)  
223 supplemented with either 0.5% glucose (BTR-G) or 0.5% sorbitol (BTR-S) was utilized for  
224 growth assays. For experiments comparing the growth of WT, DEL, and COMP strains, 1 mg/ml  
225 spectinomycin was added to the growth media to retain the pDL278 plasmid. All growth assays  
226 were done at 37°C in an anaerobic chamber (5% hydrogen, 5% carbon dioxide, 90% nitrogen).

227

### 228 **Phenotypic microarray**

229 Biolog Phenotypic microarray assays were conducted per manufacturer's recommendations (36).  
230 Briefly, overnight cultures from single bacterial colonies were diluted in fresh Brain Heart  
231 Infusion (BHI) broth and grown to an OD<sub>600</sub> of 0.6-0.7 at 37°C in an anaerobic chamber. Cells  
232 were collected via centrifugation (3,000xg, 5 min) and washed twice with PBS and resuspended  
233 to an OD<sub>600</sub> of 0.4 in IF-0a GN/GP base. Inoculating fluid was prepared and combined with cells  
234 at 81% turbidity and 100 µl of the mixture was added to each well and overlaid with 40 µl

235 mineral oil. Temperature was maintained at 37°C while absorbance values at 590 nm and 750 nm  
236 were collected every 20 min for 24 h using a Multiskan Spectrum plate reader (Thermo Fischer  
237 Scientific). Results were obtained by subtracting the measurements at 750 nm from those at 590  
238 nm, and the average of two replicates was used to construct a growth curve for each well.

239

#### 240 **sRNA discovery**

241 Bacterial cultures were grown in BHI broth to an OD<sub>600</sub> of 0.5-0.6. RNA stop solution (5%  
242 Phenol, 95% Ethanol) was added to bacterial cultures (1.25 mL stop solution per 10 mL culture)  
243 and cells were pelleted by centrifugation at 10,000xg for 10 min at 4°C. Bacterial pellets were  
244 resuspended in 1 ml of TRI reagent (Thermo Fischer Scientific) and total RNA was extracted  
245 using the manufacturer's protocol. RNA was resuspended in nuclease-free water and DNA was  
246 removed by TURBO DNase (Thermo Fischer Scientific) treatment. RNA sequencing was  
247 performed at the Yale Center for Genome Analysis using Illumina NovaSeq (paired-end, 150  
248 bp). Raw reads have been deposited in the NCBI Sequence Read Archive under the accession  
249 number PRJNA726731. RNA-seq reads were processed using Trimmomatic to remove low-  
250 quality reads and adapters (49). CLC Genomics workbench was used to map the reads to the *S.*  
251 *mutans* UA159 genome (NC\_004350.2) and to determine the total read count for each gene.  
252 Coverage plots were generated by calculating reads mapped per nucleotide across the entire  
253 genome using an in-house Perl script, as described previously (13). The Artemis genome  
254 browser (50) was used for visual inspection of transcriptomics data and gggenes package in R  
255 (version 0.4.1) was used to draw Figure 1. The putative 5' end of each sRNA was estimated from  
256 sites on transcriptional coverage plots with sharp increases in reads mapped per nucleotide.  
257 RNAalifold was used to predict secondary structure of SmsR4 and 6S RNA (51), and ARNold

258 was used to predict 3' Rho-independent terminator structures (52). For sRNAs without predicted  
259 terminators, 3' ends were defined as sites on transcriptional coverage plots with a sharp decrease  
260 in reads mapped per nucleotide. Potential open reading frames (ORFs) within sRNA genes were  
261 detected using ORF Finder (53).

262

### 263 **Stress induction**

264 Overnight cultures of *S. mutans* UA159 were diluted 1:100 in BTR-G and grown to an OD<sub>600</sub> of  
265 0.3-0.4 at 37°C in an anaerobic chamber. To induce sugar-phosphate stress, 6% xylitol in BTR  
266 broth was added to one half (treatment) and grown for 15 minutes at 37°C, while an equal  
267 volume of BTR broth without xylitol was added to the control and incubated under the same  
268 conditions. Similarly, for oxidative stress induction, 1mM H<sub>2</sub>O<sub>2</sub> was added to one half of the  
269 culture (treatment) while an equal volume of water was added to the control half and incubated  
270 for 15 minutes. For heat stress, one half of the culture was incubated at 37°C for 15 minutes  
271 (control), while the other was incubated at 45°C for 15 minutes (treatment). To induce acid  
272 stress, cultures were centrifuged and one half was resuspended in BTR-G, pH 7 (control), while  
273 the other half was resuspended in BTR-G, pH 5 (treatment), and incubated for 30 minutes at  
274 37°C. Anaerobic conditions were maintained throughout the stress induction assays. RNA was  
275 extracted as described above. To confirm stress induction, qRT-PCR was used to measure the  
276 expression of stress marker genes previously associated with each tested stress condition (54–57)  
277 (**Figure S4**). Contaminating DNA was removed by TURBO DNase (Thermo Fischer Scientific)  
278 treatment and cDNA was synthesized with a High-Capacity cDNA Reverse Transcription Kit  
279 (Thermo Fischer Scientific) using random primers. qRT-PCR was performed using SYBR Green  
280 master mix (Thermo Fischer Scientific) and gene-specific primers (**Table S2**). RNA was

281 sequenced and RNA-seq reads were processed as described above. The DESeq2 package in R  
282 was used to determine differential gene expression of sRNAs under the four stress-inducing  
283 conditions compared to controls (58). Experiments were performed in triplicate for all conditions  
284 except for acid stress, which was performed in duplicate.

285

### 286 ***In vitro* transcription**

287 Amplification of gDNA for *in vitro* transcription was performed using PCR primers designed to  
288 incorporate a T7 promoter (**Table S2**). PCR products to be used as DNA templates were cleaned  
289 using a NucleoSpin Gel and PCR Clean-up kit (Takara Bio). *In vitro* transcription was performed  
290 using MAXIscript T7 Transcription Kit (Thermo Fischer Scientific) per manufacturer's protocol  
291 with a maximum of 1 µg of DNA used as template. Following TURBO DNase treatment, RNA  
292 was purified using a Monarch RNA Cleanup Kit (New England Biolabs).

293

### 294 **Northern blot**

295 RNA was isolated from *S. mutans* cells under sugar-phosphate stress, oxidative, heat, or acid  
296 stress as described above. Equal amounts of RNA were adjusted to 10 µl with nuclease-free  
297 water, and 10 µl of 2x RNA loading dye (Thermo Fischer Scientific) was added and incubated  
298 for 10 min at 70°C followed by 3 min on ice. Samples were loaded onto either 6% or 10% TBE-  
299 Urea Gel (Thermo Fischer Scientific) along with a biotinylated sRNA ladder (Kerafast). Gels  
300 were run in 1x TBE buffer at 180V for 60 min (6% gels) or 180V for 80 min (10% gels). RNA  
301 was transferred to a Biotodyne B Nylon Membrane (Thermo Fischer Scientific) using the BioRad  
302 Mini-Trans Blot at 12V overnight, 4°C in 0.5x TBE buffer. Membranes were UV-crosslinked  
303 using a Staralinker 2400 UV Crosslinker (1200 mJ) and were moved to glass hybridization

304 chambers and prehybridized using 10 ml of ULTRAhyb-Oligo Buffer (Thermo Fischer  
305 Scientific) at 45°C for 2 h with rotation. RNA probes produced from *in vitro* transcription as  
306 described above were heated at 95°C for 5 min and cooled on ice for 3 min, then added to fresh  
307 hybridization buffer. Membranes were incubated overnight at 45°C with rotation. After washing,  
308 membranes were incubated for 2 h with shaking in Licor Intercept Blocking Buffer with 1% SDS  
309 at room temperature. Blocking buffer was removed and membranes were incubated in  
310 Streptavidin-IRDye 800 CW diluted 1:20,000 in Licor Intercept Blocking Buffer with 1% SDS  
311 for 30 min. Blots were washed and viewed on a Licor Odyssey scanner.

312

### 313 **EMSA and mutagenesis**

314 Electromobility shift assay (EMSA) was performed as described previously (59). Briefly, a DNA  
315 template was amplified from *S. mutans* UA159 gDNA using primers with a T7 tag (**Table S2**).  
316 RNA was transcribed from this template using the MAXI T7 Transcription Kit that incorporated  
317 biotinylated uracil into the sRNA transcript. RNA was purified with a Monarch RNA Cleanup  
318 Kit and resuspended in TE buffer. SmsR4 and SMU\_313 transcripts were combined at ratios  
319 shown in **Figure 7** and heated for 5 min at 85°C, then immersed in ice for 30 sec. The reaction  
320 volume was adjusted to 10 µl with 5x TMN buffer and incubated at 37°C for 30 min. Samples  
321 were run on an 8% TBE gel (Thermo Fischer Scientific) for 90 min at 100 V in 1x TBE buffer.  
322 The gel was transferred to a Biotodyne B Membrane overnight at 12V, 4°C in 0.5x TBE.  
323 Membranes were crosslinked, blocked, and probed with Streptavidin-IRDye 800CW as  
324 described above for Northern blot assays, and images were examined on a Licor Odyssey  
325 scanner. SMU\_313 with mutated SmsR4-binding site was constructed using the Q5 Mutagenesis  
326 Kit (New England Biolabs) and mutations were confirmed through Sanger sequencing.

327

### 328 **Gene deletion and complementation**

329 SmsR4- and SMU\_313-deletion strains were constructed using the markerless-mutagenic system  
330 and an IDFC2 selection and counter-selection cassette, as described previously (60).

331 Complementation was performed using the pDL278 plasmid designed for expression in both *E.*  
332 *coli* and *S. mutans* (31, 32). The plasmid was purified from *E. coli* using a Plasmid MiniPrep kit  
333 (Thermo Fischer Scientific). pDL278 was linearized using BamHI and EcoRI, and PCR products  
334 (**Table S2**) were ligated into the linearized plasmid using T4 ligase (Thermo Fischer Scientific).  
335 Plasmids were then transformed into competent *E. coli* DH5-alpha cells following  
336 manufacturer's protocol (New England Biolabs). Sanger sequencing was used to confirm  
337 plasmid construction. Purified plasmids were transformed into *S. mutans* using competence  
338 stimulating peptide as described previously (60).

339

### 340 **RACE assay**

341 Rapid Amplification of cDNA Ends (RACE) was performed using a RACE kit (Thermo Fisher  
342 Scientific) per the manufacturer's recommendations. 5' RACE assay was conducted using a gene  
343 specific primer (GSP) complementary to the 3' end of SmsR4 (**Table S2**). RNA degradation,  
344 cDNA synthesis, and TdT tailing were accomplished using kit components and manufacturer  
345 protocols. A second nested GSP was used to amplify the tailed cDNA, and the PCR product from  
346 this reaction was cloned into pGEM T-Easy vector (Promega), transformed into competent DH5-  
347 alpha *E. coli* and the 5' end of SmsR4 was determined using Sanger sequencing. For the 3'  
348 RACE assay, Poly-A polymerase (New England Biolabs) was used to add poly-A tails to all  
349 transcripts. Precipitated poly-A tailed RNA was reverse transcribed using an oligo-dT adapter



350 primer and SuperScript II reverse transcriptase. RNA was subsequently degraded using RNase  
351 H. A GSP designed to bind to the 5' end of SmsR4 and an Abridged Universal Amplification  
352 Primer (**Table S2**) were used to amplify the cDNA, and PCR products were cloned into pGEM  
353 T-Easy vector, transformed into competent *E. coli* DH5-alpha cells and the 3' end of SmsR4 was  
354 identified using Sanger sequencing.

355

### 356 **Covariance modeling**

357 Covariance models of sRNAs were constructed as previously described (61, 62). Briefly, SmsR4  
358 and 6S sequences from *S. mutans* UA159 were used as queries in BlastN searches against all  
359 *Streptococcus* genomes available in RefSeq (63, 64). Hits with >65% identity and >70%  
360 coverage were retained and five and six sequences were randomly selected to serve as seed  
361 sequences for constructing 6S and SmsR4 covariance models, respectively (**Table S3**). The  
362 WAR webserver was used to align the seed sequences and the Infernal suite of tools (v1.1.2) was  
363 used to construct (cmbuild) and calibrate (cmcalibrate) an initial covariance model for each  
364 sRNA (65, 66). This model was used to search (cmsearch) a database constructed from 37  
365 representative *Streptococcus* full genomes available on RefSeq (**Table S4**). Results from  
366 cmsearch with an e-value <1e-5 were used to add unrepresented sequences to the query model,  
367 which was then refined, recalibrated, and used for another round of cmsearch. This process was  
368 repeated for each sRNA until cmsearch failed to yield new unrepresented sequences. The final  
369 models were used to determine the prevalence of 6S and SmsR4 in 62 full and partial  
370 *Streptococcus* genomes (**Table S5**). The presence or absence of each sRNAs was mapped on a  
371 previously published phylogenetic tree (29) and nodes of sRNA origin and secondary loss were  
372 determined through maximum parsimony.

373

374 ***In silico* sRNA target prediction**

375 For SmsR4 target prediction using IntaRNA (67), SmsR4 sequence as determined by RACE  
376 assay was used as input and searched against the *S. mutans* UA159 genome using default  
377 parameters (75 nt upstream and downstream from the translation start site, one interaction per  
378 pair, 7 nt hybridization seed). Target RNA2 (68) was run using the same query sequence and  
379 default parameters (80 nt upstream and 20 nt downstream from the translation start site, 7 nt  
380 hybridization seed). IntaRNA was also used to predict targets for 11 other sRNAs using stricter  
381 parameters to identify potential interactions adjacent to translation start sites of mRNA targets.  
382 For all *in silico* target predictions, only significant results ( $p < 0.05$ , as determined by IntaRNA  
383 or Target RNA2) were retained.

384

385 **ACKNOWLEDGEMENTS**

386 We thank Zhengzhong Zou and Samantha Fancher for their assistance with experiments, and  
387 Shaun Wachter for technical advice. This work was supported in part by National Institute of  
388 Dental and Craniofacial Research grants DE028409 to RR and DE028252 to JM.

389

390

391 **REFERENCES**

- 392 1. Forssten SD, Björklund M, Ouwehand AC. 2010. *Streptococcus mutans*, caries and  
393 simulation models. *Nutrients* 2:290–298.
- 394 2. Hamada S, Koga T, Ooshima T. 1984. Virulence factors of *Streptococcus mutans* and  
395 dental caries prevention. *J Dent Res* 63:407–411.
- 396 3. Loesche WJ. 1986. Role of *Streptococcus mutans* in human dental decay. *Microbiol Rev*  
397 50:353–380.
- 398 4. Bowen WH, Burne RA, Wu H, Koo H. 2018. Oral biofilms: pathogens, matrix, and  
399 polymicrobial interactions in microenvironments. *Trends Microbiol* 26:229–242.
- 400 5. Ajdić D, McShan WM, McLaughlin RE, Savić G, Chang J, Carson MB, Primeaux C, Tian  
401 R, Kenton S, Jia H, Lin S, Qian Y, Li S, Zhu H, Najjar F, Lai H, White J, Roe BA, Ferretti  
402 JJ. 2002. Genome sequence of *Streptococcus mutans* UA159, a cariogenic dental pathogen.  
403 *Proc Natl Acad Sci U S A* 99:14434–14439.
- 404 6. Lemos JA, Palmer SR, Zeng L, Wen ZT, Kajfasz JK, Freires IA, Abranches J, Brady LJ.  
405 2019. The biology of *Streptococcus mutans*. *Microbiol Spectr* 7.
- 406 7. Deutscher J, Francke C, Postma PW. 2006. How phosphotransferase system-related protein  
407 phosphorylation regulates carbohydrate metabolism in bacteria. *Microbiol Mol Biol Rev*  
408 70:939–1031.

- 409 8. Takahashi-Abbe S, Abbe K, Takahashi N, Tamazawa Y, Yamada T. 2001. Inhibitory effect  
410 of sorbitol on sugar metabolism of *Streptococcus mutans* in vitro and on acid production in  
411 dental plaque in vivo. *Oral Microbiol Immunol* 16:94–99.
- 412 9. Mäkinen KK. 2010. Sugar alcohols, caries incidence, and remineralization of caries lesions:  
413 a literature review. *Int J Dent* 2010:981072.
- 414 10. Lemos JA, Burne RA. 2008. A model of efficiency: stress tolerance by *Streptococcus*  
415 *mutans*. *Microbiology (Reading)* 154:3247–3255.
- 416 11. Storz G, Vogel J, Wassarman KM. 2011. Regulation by small RNAs in bacteria: expanding  
417 frontiers. *Mol Cell* 43:880–891.
- 418 12. Holmqvist E, Wagner EGH. 2017. Impact of bacterial sRNAs in stress responses. *Biochem*  
419 *Soc Trans* 45:1203–1212.
- 420 13. Raghavan R, Groisman EA, Ochman H. 2011. Genome-wide detection of novel regulatory  
421 RNAs in *Escherichia coli*. *Genome Res* 21:1487–1497.
- 422 14. Warriar I, Hicks LD, Battisti JM, Raghavan R, Minnick MF. 2014. Identification of novel  
423 small RNAs and characterization of the 6S RNA of *Coxiella burnetii*. *PLoS One*  
424 9:e100147.
- 425 15. Wachter S, Hicks LD, Raghavan R, Minnick MF. 2020. Novel small RNAs expressed by  
426 *Bartonella bacilliformis* under multiple conditions reveal potential mechanisms for  
427 persistence in the sand fly vector and human host. *PLoS Negl Trop Dis* 14:e0008671.

- 428 16. Kalvari I, Argasinska J, Quinones-Olvera N, Nawrocki EP, Rivas E, Eddy SR, Bateman A,  
429 Finn RD, Petrov AI. 2018. Rfam 13.0: shifting to a genome-centric resource for non-coding  
430 RNA families. *Nucleic Acids Res* 46:D335–D342.
- 431 17. Zeng L, Choi SC, Danko CG, Siepel A, Stanhope MJ, Burne RA. 2013. Gene regulation by  
432 CcpA and catabolite repression explored by RNA-Seq in *Streptococcus mutans*. *PLoS One*  
433 8:e60465.
- 434 18. Jester BC, Romby P, Lioliou E. 2012. When ribonucleases come into play in pathogens: a  
435 survey of gram-positive bacteria. *International Journal of Microbiology* 2012:e592196.
- 436 19. Mars RAT, Nicolas P, Denham EL, van Dijl JM. 2016. Regulatory RNAs in *Bacillus*  
437 *subtilis*: a gram-positive perspective on bacterial RNA-mediated regulation of gene  
438 expression. *Microbiol Mol Biol Rev* 80:1029–1057.
- 439 20. Menendez-Gil P, Toledo-Arana A. 2021. Bacterial 3' UTRs: a useful resource in post-  
440 transcriptional regulation. *Front Mol Biosci* 7:617633.
- 441 21. Merritt J, Chen Z, Liu N, Kreth J. 2014. Posttranscriptional regulation of oral bacterial  
442 adaptive responses. *Curr Oral Health Rep* 1:50–58.
- 443 22. Mohanty BK, Kushner SR. 2018. Enzymes involved in post-transcriptional RNA  
444 metabolism in gram-negative bacteria. *Microbiol Spectr* 6:10.1128/microbiolspec.RWR-  
445 0011–2017.

- 446 23. Sinha D, Zimmer K, Cameron TA, Rusch DB, Winkler ME, De Lay NR. 2019. Redefining  
447 the small regulatory RNA transcriptome in *Streptococcus pneumoniae* serotype 2 strain  
448 D39. *J Bacteriol* 201:e00764-18.
- 449 24. Barrick JE, Sudarsan N, Weinburg Z, Ruzzo WL, Breaker RR. 2005. 6S RNA is a  
450 widespread regulator of eubacterial RNA polymerase that resembles an open promoter.  
451 *RNA* 11:774–784.
- 452 25. Cavanagh AT, Wassarman KM. 2014. 6S RNA, a global regulator of transcription in  
453 *Escherichia coli*, *Bacillus subtilis*, and beyond. *Annu Rev Microbiol* 68:45–60.
- 454 26. Trotochaud AE, Wassarman KM. 2005. A highly conserved 6S RNA structure is required  
455 for regulation of transcription. *Nat Struct Mol Biol* 12:313–319.
- 456 27. Belda E, Sekowska A, Le Fèvre F, Morgat A, Mornico D, Ouzounis C, Vallenet D,  
457 Médigue C, Danchin A. 2013. An updated metabolic view of the *Bacillus subtilis* 168  
458 genome. *Microbiology (Reading)* 159:757–770.
- 459 28. Chae H, Han K, Kim K, Park H, Lee J, Lee Y. 2011. Rho-dependent termination of *ssrS*  
460 (6S RNA) transcription in *Escherichia coli*. *J Biol Chem* 286:114–122.
- 461 29. Patel S, Gupta RS. 2018. Robust demarcation of fourteen different species groups within  
462 the genus *Streptococcus* based on genome-based phylogenies and molecular signatures.  
463 *Infection, Genetics and Evolution* 66:130–151.
- 464 30. Bochner BR, Gadzinski P, Panomitros E. 2001. Phenotype microarrays for high-throughput  
465 phenotypic testing and assay of gene function. *Genome Res* 11:1246–1255.

- 466 31. LeBlanc DJ, Lee LN, Abu-Al-Jaibat A. 1992. Molecular, genetic, and functional analysis of  
467 the basic replicon of pVA380-1, a plasmid of oral streptococcal origin. *Plasmid* 28:130–  
468 145.
- 469 32. Zhou L, Manias DA, Dunny GM. 2000. Regulation of intron function: efficient splicing in  
470 vivo of a bacterial group II intron requires a functional promoter within the intron. *Mol*  
471 *Microbiol* 37:639–651.
- 472 33. Chao Y, Papenfort K, Reinhardt R, Sharma CM, Vogel J. 2012. An atlas of Hfq-bound  
473 transcripts reveals 3' UTRs as a genomic reservoir of regulatory small RNAs. *EMBO J*  
474 31:4005–4019.
- 475 34. Hoyos M, Huber M, Förstner KU, Papenfort K. 2020. Gene autoregulation by 3' UTR-  
476 derived bacterial small RNAs. *Elife* 9:e58836.
- 477 35. Lalaouna D, Baude J, Wu Z, Tomasini A, Chicher J, Marzi S, Vandenesch F, Romby P,  
478 Caldelari I, Moreau K. 2019. RsaC sRNA modulates the oxidative stress response of  
479 *Staphylococcus aureus* during manganese starvation. *Nucleic Acids Res* 47:9871–9887.
- 480 36. Miyakoshi M, Chao Y, Vogel J. 2015. Regulatory small RNAs from the 3' regions of  
481 bacterial mRNAs. *Curr Opin Microbiol* 24:132–139.
- 482 37. van der Meulen SB, Hesselting-Meinders A, de Jong A, Kok J. 2019. The protein regulator  
483 ArgR and the sRNA derived from the 3'-UTR region of its gene, ArgX, both regulate the  
484 arginine deiminase pathway in *Lactococcus lactis*. *PLoS One* 14:e0218508.

- 485 38. Adams PP, Baniulyte G, Esnault C, Chegireddy K, Singh N, Monge M, Dale RK, Storz G,  
486 Wade JT. 2021. Regulatory roles of *Escherichia coli* 5' UTR and ORF-internal RNAs  
487 detected by 3' end mapping. *eLife* 10:e62438.
- 488 39. Garst AD, Edwards AL, Batey RT. 2011. Riboswitches: structures and mechanisms. *Cold*  
489 *Spring Harb Perspect Biol* 3:a003533.
- 490 40. Jose BR, Gardner PP, Barquist L. 2019. Transcriptional noise and exaptation as sources for  
491 bacterial sRNAs. *Biochem Soc Trans* 47:527–539.
- 492 41. Lybecker M, Bilusic I, Raghavan R. 2014. Pervasive transcription: detecting functional  
493 RNAs in bacteria. *Transcription* 5:e944039.
- 494 42. Raina M, King A, Bianco C, Vanderpool CK. 2018. Dual-Function RNAs. *Microbiology*  
495 *Spectrum* 6:6.5.06.
- 496 43. Deutscher J, Aké FMD, Derkaoui M, Zébré AC, Cao TN, Bouraoui H, Kentache T,  
497 Mokhtari A, Milohanic E, Joyet P. 2014. The bacterial phosphoenolpyruvate:carbohydrate  
498 phosphotransferase system: regulation by protein phosphorylation and phosphorylation-  
499 dependent protein-protein interactions. *Microbiology and Molecular Biology Reviews*  
500 78:231–256.
- 501 44. Richards GR, Patel MV, Lloyd CR, Vanderpool CK. 2013. Depletion of glycolytic  
502 intermediates plays a key role in glucose-phosphate stress in *Escherichia coli*. *J Bacteriol*  
503 195:4816–4825.



- 504 45. Bobrovskyy M, Vanderpool CK. 2014. The small RNA SgrS: roles in metabolism and  
505 pathogenesis of enteric bacteria. *Front Cell Infect Microbiol* 4:61.
- 506 46. Rice JB, Vanderpool CK. 2011. The small RNA SgrS controls sugar–phosphate  
507 accumulation by regulating multiple PTS genes. *Nucleic Acids Res* 39:3806–3819.
- 508 47. Jeng W-Y, Panjaitan NSD, Horng Y-T, Chung W-T, Chien C-C, Soo P-C. 2017. The  
509 negative effects of KPN00353 on glycerol kinase and microaerobic 1,3-propanediol  
510 production in *Klebsiella pneumoniae*. *Front Microbiol* 8:2441.
- 511 48. Choi J, Shin D, Yoon H, Kim J, Lee C-R, Kim M, Seok Y-J, Ryu S. 2010. *Salmonella*  
512 pathogenicity island 2 expression negatively controlled by EIIANtr-SsrB interaction is  
513 required for *Salmonella* virulence. *Proc Natl Acad Sci U S A* 107:20506–20511.
- 514 49. Bolger AM, Lohse M, Usadel B. 2014. Trimmomatic: a flexible trimmer for Illumina  
515 sequence data. *Bioinformatics* 30:2114–2120.
- 516 50. Rutherford K, Parkhill J, Crook J, Horsnell T, Rice P, Rajandream M-A, Barrell B. 2000.  
517 Artemis: sequence visualization and annotation. *Bioinformatics* 16:944–945.
- 518 51. Hofacker IL. 2007. RNA consensus structure prediction with RNAalifold. *Methods Mol*  
519 *Biol* 395:527–544.
- 520 52. Naville M, Ghuillot-Gaudeffroy A, Marchais A, Gautheret D. 2011. ARNold: a web tool  
521 for the prediction of Rho-independent transcription terminators. *RNA Biol* 8:11–13.
- 522 53. Stothard P. 2000. The sequence manipulation suite: JavaScript programs for analyzing and  
523 formatting protein and DNA sequences. *Biotechniques* 28:1102, 1104.

- 524 54. Decker E-M, Klein C, Schwindt D, von Ohle C. 2014. Metabolic activity of *Streptococcus*  
525 *mutans* biofilms and gene expression during exposure to xylitol and sucrose. *Int J Oral Sci*  
526 6:195–204.
- 527 55. Gong Y, Tian X-L, Sutherland T, Sisson G, Mai J, Ling J, Li Y-H. 2009. Global  
528 transcriptional analysis of acid-inducible genes in *Streptococcus mutans*: multiple two-  
529 component systems involved in acid adaptation. *Microbiology (Reading)* 155:3322–3332.
- 530 56. Kajfasz JK, Ganguly T, Hardin EL, Abranches J, Lemos JA. 2017. Transcriptome  
531 responses of *Streptococcus mutans* to peroxide stress: identification of novel antioxidant  
532 pathways regulated by Spx. *Sci Rep* 7:16018.
- 533 57. Liu C, Niu Y, Zhou X, Zheng X, Wang S, Guo Q, Li Y, Li M, Li J, Yang Y, Ding Y,  
534 Lamont RJ, Xu X. 2015. *Streptococcus mutans* copes with heat stress by multiple  
535 transcriptional regulons modulating virulence and energy metabolism. *Sci Rep* 5:12929.
- 536 58. Love MI, Huber W, Anders S. 2014. Moderated estimation of fold change and dispersion  
537 for RNA-seq data with DESeq2. *Genome Biology* 15:550.
- 538 59. Wachter S, Bonazzi M, Shifflett K, Moses AS, Raghavan R, Minnick MF. A CsrA-binding,  
539 trans-acting sRNA of *Coxiella burnetii* is necessary for optimal intracellular growth and  
540 vacuole formation during early infection of host cells. *Journal of Bacteriology* 201:e00524-  
541 19.
- 542 60. Xie Z, Okinaga T, Qi F, Zhang Z, Merritt J. 2011. Cloning-independent and  
543 counterselectable markerless mutagenesis system in *Streptococcus mutans*. *Appl Environ*  
544 *Microbiol* 77:8025–8033.

- 545 61. Barquist L, Burge SW, Gardner PP. 2016. Studying RNA homology and conservation with  
546 Infernal: from single sequences to RNA families. *Curr Protoc Bioinformatics* 54:12.13.1-  
547 12.13.25.
- 548 62. Krieger MC, Dutcher HA, Ashford AJ, Raghavan R. 2021. A peroxide-responding sRNA  
549 evolved from a peroxidase mRNA. *bioRxiv* doi: <https://doi.org/10.1101/20211018464853>  
550 2021.10.18.464853.
- 551 63. Altschul SF, Gish W, Miller W, Myers EW, Lipman DJ. 1990. Basic local alignment search  
552 tool. *J Mol Biol* 215:403–410.
- 553 64. O’Leary NA, Wright MW, Brister JR, Ciufu S, Haddad D, McVeigh R, Rajput B,  
554 Robbertse B, Smith-White B, Ako-Adjei D, Astashyn A, Badretdin A, Bao Y, Blinkova O,  
555 Brover V, Chetvernin V, Choi J, Cox E, Ermolaeva O, Farrell CM, Goldfarb T, Gupta T,  
556 Haft D, Hatcher E, Hlavina W, Joardar VS, Kodali VK, Li W, Maglott D, Masterson P,  
557 McGarvey KM, Murphy MR, O’Neill K, Pujar S, Rangwala SH, Rausch D, Riddick LD,  
558 Schoch C, Shkeda A, Storz SS, Sun H, Thibaud-Nissen F, Tolstoy I, Tully RE, Vatsan AR,  
559 Wallin C, Webb D, Wu W, Landrum MJ, Kimchi A, Tatusova T, DiCuccio M, Kitts P,  
560 Murphy TD, Pruitt KD. 2016. Reference sequence (RefSeq) database at NCBI: current  
561 status, taxonomic expansion, and functional annotation. *Nucleic Acids Res* 44:D733-745.
- 562 65. Torarinsson E, Lindgreen S. 2008. WAR: Webserver for aligning structural RNAs. *Nucleic*  
563 *Acids Res* 36:W79–W84.
- 564 66. Nawrocki EP, Eddy SR. 2013. Infernal 1.1: 100-fold faster RNA homology searches.  
565 *Bioinformatics* 29:2933–2935.

- 566 67. Mann M, Wright PR, Backofen R. 2017. IntaRNA 2.0: enhanced and customizable  
567 prediction of RNA-RNA interactions. *Nucleic Acids Res* 45:W435–W439.
- 568 68. Kery MB, Feldman M, Livny J, Tjaden B. 2014. TargetRNA2: identifying targets of small  
569 regulatory RNAs in bacteria. *Nucleic Acids Res* 42:W124–W129.
- 570
- 571

572 **Table 1. Novel sRNAs in *S. mutans*.**

| sRNA <sup>a</sup> | Rfam annotation <sup>b</sup> | Previous prediction <sup>c</sup> | Bordering gene (left) | sRNA left bound <sup>d</sup> | sRNA right bound <sup>d</sup> | Bordering gene (right) | Strand | Predicted size (nt) |
|-------------------|------------------------------|----------------------------------|-----------------------|------------------------------|-------------------------------|------------------------|--------|---------------------|
| SmsR1             |                              |                                  | SMU_61                | 62597                        | 62953                         | SMU_63c                | F      | 357                 |
| SmsR2             |                              | psRNA-31                         | SMU_97                | 99488                        | 99909                         | SMU_t19                | R      | 422                 |
| SmsR3             |                              | psRNA-54                         | SMU_219               | 211498                       | 211709                        | SMU_220c               | R      | 212                 |
| SmsR4             |                              | psRNA-62                         | SMU_318               | 303748                       | 303857                        | SMU_320                | R      | 110                 |
| SmsR5             | RNase P                      | psRNA-73                         | SMU_471               | 439833                       | 440221                        | SMU_472                | F      | 389                 |
| SmsR6             |                              | psRNA-78                         | SMU_530c              | 497858                       | 498119                        | SMU_531                | F      | 262                 |
| SmsR7             |                              |                                  | SMU_1046c             | 995311                       | 995586                        | SMU_1048               | R      | 276                 |
| SmsR8             | tmRNA                        |                                  | SMU_1196c             | 1139336                      | 1139677                       | SMU_1197               | R      | 342                 |
| SmsR12            |                              | psRNA-204<br>psRNA-205           | SMU_1862              | 1757885                      | 1758495                       | SMU_1865               | R      | 611                 |
| SmsR14            | 6S                           | psRNA-235                        | SMU_2056              | 1929960                      | 1930160                       | SMU_2057c              | F      | 200                 |
| SmsR16            |                              |                                  | SMU_803c              | 749489                       | 749732                        | SMU_804                | R      | 244                 |
| SmsR18            |                              | psRNA-132                        | SMU_1332c             | 1254431                      | 1255035                       | SMU_1334               | R      | 605                 |
| SmsR19            |                              |                                  | SMU_1398              | 1327742                      | 1328337                       | SMU_1400c              | R      | 596                 |
| SmsR20            |                              | psRNA-150                        | SMU_1512              | 1439375                      | 1439585                       | SMU_1513               | R      | 211                 |
| SmsR22            |                              |                                  | SMU_1703              | 1614938                      | 1615314                       | SMU_1704               | R      | 377                 |

573 <sup>a</sup>Small RNAs were named SmsR1-SmsR22 (Note: some of the original candidate sRNAs were  
574 later excluded from analysis).

575 <sup>b</sup>Existing Rfam entries for the putative sRNAs.

576 <sup>c</sup>Previously predicted sRNAs that overlap with our results (17).

577 <sup>d</sup>The putative 5' ends of sRNAs were estimated using visual scans of RNA-seq coverage plots for  
578 sites with sharp increases in reads mapped per nucleotide. 3' ends were estimated based on the  
579 locations of predicted terminators (**Table 2**) or for sRNAs without predicted terminators visual  
580 scans of the RNA-seq coverage plots were used to identify sites with sharp drops in reads per  
581 nucleotide. SmsR4 boundaries were confirmed using 5' and 3' RACE assays.

582

583 **Table 2. Predicted promoter and terminator elements of novel sRNAs.**

| sRNA   | -10 Promoter <sup>a</sup>                                        | Terminator <sup>b</sup>                                            |
|--------|------------------------------------------------------------------|--------------------------------------------------------------------|
| SmsR1  | TGTCCTGTTCTTTTTTTGAAGGATCAT<br><b>TATAAAT</b> GAATGATATCAAAAAGAA | CTAACTAAAACAGAGACTCACATTACAATCAC<br>ACGTGAATCTCTgTTTTCTTAGCTG      |
| SmsR2  | ACTAAACTATACGTGTATTCGTTTTGT<br>TGGCAGCCAATTTCTTTAACTATAAC        | CAAAAAAGAAACACCTTCTTAAATCTAGTAA<br>ATGAGATTTAAGAAGGTGTTCTTTATAAGCA |
| SmsR3  | ACAGTTGTTTTATCGTTTGTGGAGAAAT<br>ATGATATAAATACTAACGGCACAAACT      | GTGTAAAAAAGCCTTAGCTCTGCCAAGCTAG<br>GGCTTTTCCGTTGCC                 |
| SmsR4  | ACTTTAAGGTTTCTTTAAGGTTTCTCA<br>TATATACTTTAATCATCTAAAACAA         | TTCTTAAAAACCTTGCAGACTTAAATCTGCA<br>AGGTTTTTTAATTTCG                |
| SmsR5  | TGGTAAACAAATTACCGAATAGATTAA<br>GAAAACGATGCAATTTTTGATAATC         | ATAATAGGTGAGCTAGCTTTGGCTAGCTTTTA<br>TTGTCTT                        |
| SmsR6  | GCAAATATGCTTGCAATTCTTTTTTAG<br>AAAGTGATAAATCGTAAGAAAATAAT        | AGATTTAACGCCCTCACACAGATTTTCTGTGT<br>GAGGTTTTTTGTTATC               |
| SmsR7  | CTTTGTTAAGCTTATTTATTATGATAT<br>AATGAAGTATTCAATTGAAGAAAAG         | TCTTCCAAGTAGCAGAAGCATTGATGTTTCTG<br>CcaTTTTTAACACAG                |
| SmsR8  | TTTTTCCTTTATTTTGCTATACTATTT<br>TCACACAATATGTACTGGGGTCGTTA        | No terminators found                                               |
| SmsR12 | TCTTGACAAATGTAAGCGTTACGATA<br>AAATAAATTTAGAAAAAGATAAGAA          | AAATAATAAGAGACCCCAACGATGAGCGTGT<br>AGATTGTTGGGGTCTTAATTGTATTGA     |
| SmsR14 | TTAACTTGAATTTTTTTTAACATATATGG<br>TATCATATTTAAAGAAGAAATTGCTGT     | No terminators found                                               |
| SmsR16 | TGAAAGCGTTTTGTAAACTGACTTTA<br>GCAAATTATTTGGAGGTAAGGTGCAT         | No terminators found                                               |
| SmsR18 | GATAGATAATTTTCATAGTTATTTGTT<br>AAAAGTGAATAAATAAGAATTATCCG        | No terminators found                                               |
| SmsR19 | GCTAGAAAGATTGATTTCTAGCGATTT<br>TTTAGGATAAATAAGCAATCAAAA          | AATAAGCAAAAGACACTTGAAGCAATAATTCA<br>AGTGTCTTTTATGGGACTT            |
| SmsR20 | CAAGGAAACAAGGCGGGAACGACAAAA<br>TCATTTCTGTAAATTGCAATGGAAATC       | No terminators found                                               |
| SmsR22 | AAGAAAACCTGTTATTAACCTTATTTT<br>TTGATATGCTATAAGTGTCTTCAGGG        | TCTTTAGGCCTCTTTTCGATTTGTAAAAATTG<br>GAGGAaTTTTTTTATGAA             |

584 <sup>a</sup> -10 promoter elements were determined from a manual scan of sites upstream of transcription  
 585 start sites (in green) estimated from RNA-seq data. Sites that contained at least 4/6 of the  
 586 TATAAT consensus promoter sequence, including an A at position two and a T at position six  
 587 were identified and are in bold.

588 <sup>b</sup>Intrinsic terminators were predicted by ARNold (52). The predicted stem-loop structure is  
 589 shown in blue (stem) and red (loop).

590

591 **Table 3. Stress conditions tested in this study.**

| <b>Stress Type</b> | <b>Condition</b>                  | <b>Exposure Time</b> |
|--------------------|-----------------------------------|----------------------|
| Sugar-phosphate    | 6% xylitol                        | 30 minutes           |
| Oxidative          | 1mM H <sub>2</sub> O <sub>2</sub> | 15 minutes           |
| Heat               | 45°C                              | 15 minutes           |
| Acid               | pH 5                              | 30 minutes           |

592

593

594 **FIGURE LEGENDS**

595 **Figures 1A and 1B. Expression profiles of novel sRNAs in *S. mutans*.** RNA-seq reads mapped  
596 to forward (red) and reverse (blue) strands of the *S. mutans* UA159 genome are shown. Y-axes  
597 denote the number of RNA-seq reads mapped to each nucleotide. Genomic locations of novel  
598 sRNA genes (black arrows) and flanking genes (grey arrows) along with their nucleotide  
599 positions are shown below the coverage plots. Northern blot performed for each sRNA is shown  
600 to the right. White arrows denote estimated sizes of sRNAs (**Table 1**). (Note: intensity between  
601 each blot is not comparable as exposure times differed between experiments.)

602

603 **Figure 2. Differential expression of novel sRNAs in response to stress.** Expression values for  
604 sRNAs were calculated from the total number of mapped RNA-seq reads. For each sRNA, Log<sub>2</sub>  
605 fold change between treatment (stress) and control (no stress) samples (+/- standard error) from  
606 three replicate experiments are shown, except for acid stress, which used two replicates. Only  
607 expression values that were significantly different ( $p \leq 0.05$ , Wald test) between stress and  
608 control conditions are displayed.

609

610 **Figure 3. 6S RNA and SmsR4 are distinct sRNAs.** The genome locations and predicted  
611 secondary structures of 6S RNAs in *Bacillus subtilis*, *Streptococcus mutans*, and *Escherichia coli*  
612 are shown in the top three panels. The genome location and secondary structure of SmsR4 in *S.*  
613 *mutans* is displayed in the bottom panel. Genes that encode N-acetyldiaminopimelate deacetylase  
614 and 5-formyltetrahydrofolate cyclo-ligase are abbreviated as N-Ad and 5-FTC, respectively.  
615 (Note: genes are not drawn to scale.)

616



617 **Figure 4. Prevalence of 6S RNA and SmsR4 in *Streptococcus*.** Presence or absence of 6S and  
618 SmsR4 as determined by a covariance modeling-based search is shown. In most species, 6S is  
619 present between genes for RarA and tRNA-Lys, whereas SmsR4 is located between genes that  
620 encode 5-formyltetrahydrofolate cyclo-ligase (5-FTC) and N-acetyldiaminopimelate deacetylase  
621 (N-Ad). Flanking genes other than *rarA*, tRNA-Lys, 5-FTC, and N-Ad are shown as white  
622 arrows. The cladogram is from Patel and Gupta 2018 (29). (Note: genes are not drawn to scale.)

623  
624 **Figure 5. SmsR4 promotes *S. mutans* growth in sorbitol-containing medium.** Growth of  
625 wild-type (WT), SmsR4-deletion (DEL), and SmsR4 complementation (COMP) strains in BTR  
626 medium with glucose (BTR-G, left) or sorbitol (BTR-S, right).

627  
628 **Figure 6. SmsR4 is predicted to bind to SMU\_313. A)** Two target prediction algorithms,  
629 IntaRNA (67) (left) and TargetRNA2 (68) (right), identified SMU\_313 as a potential target of  
630 SmsR4. The predicted interaction sites on SmsR4 and 5' untranslated region of SMU\_313 are  
631 shown, and the start codon (AUG) of SMU\_313 has been highlighted. The nucleotides  
632 highlighted in red are required for efficient binding of SmsR4 to SMU\_313 (see **Figure 7**). **B)**  
633 Genomic locations of sorbitol phosphotransferase (PTS) system operon, including SMU\_313  
634 (blue), and SmsR4 (teal) in *S. mutans*.

635  
636 **Figure 7. SmsR4 binds to SMU\_313. A)** An RNA-RNA electrophoretic mobility shift assay  
637 (EMSA) shows that increasing concentrations of SMU\_313 with native 5' untranslated sequence  
638 binds well to SmsR4. A control lane with unbound SmsR4 is shown to the right. **B)** SMU\_313  
639 transcript with a mutated binding site does not interact with SmsR4. A control lane with native

640 SMU\_313 transcript ran on the same gel is shown on the right. The native and mutated SmsR4-  
641 binding sites on SMU\_313 are shown in red, and start codon is highlighted in yellow.  
642

643 **SUPPLEMENTAL FIGURE LEGENDS**

644 **Figure S1. Phenotypic microarray.** Growth of wild-type (WT) and SmsR4-deletion (DEL)  
645 strains in Biolog medium with sorbitol as sole carbon source (30). Values represent the average  
646 of two independent growth experiments.

647

648 **Figure S2. Effect of SMU\_313 deletion on growth in sorbitol.** Growth of SMU\_313-deletion  
649 (SMU\_313 DEL) and wild-type (WT) strains of *S. mutans* in BTR medium with glucose (BTR-  
650 G, left), or sorbitol (BTR-S, right).

651

652 **Figure S3. SmsR4 expression over time.** Northern blot for SmsR4 in wild-type *S. mutans*  
653 grown in BTR-S was performed at time-points shown. 5S RNA was used as a loading control.

654

655 **Figure S4. Confirmation of stress induction.** Either upregulation or downregulation of genes  
656 known to be associated with each stress condition were used to confirm stress induction (54–57).  
657 Values represent means (+/- standard error) from three independent qPCR assays, except for  
658 *groES* and SMU\_1805, which were from two replicates.

659

660 **SUPPLEMENTAL TABLES**

661 **Table S1.** Targets predicted by IntaRNA for novel sRNAs.

662 **Table S2.** Primers used in this study.

663 **Table S3.** Genomes used for initial SmsR4 and 6S covariance model construction.

664 **Table S4.** Genomes used for covariance model calibration.

665 **Table S5.** Genomes used to determine the prevalence of 6S and SmsR4 in *Streptococcus*.

### SmsR1

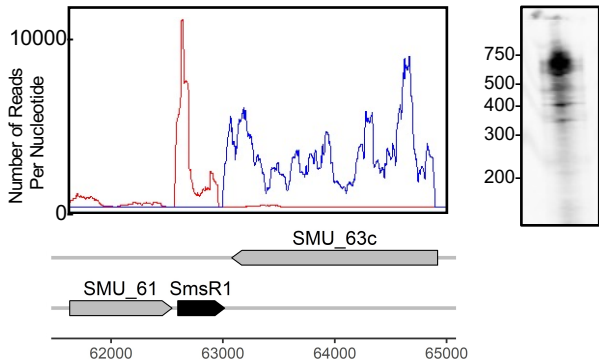

### SmsR2

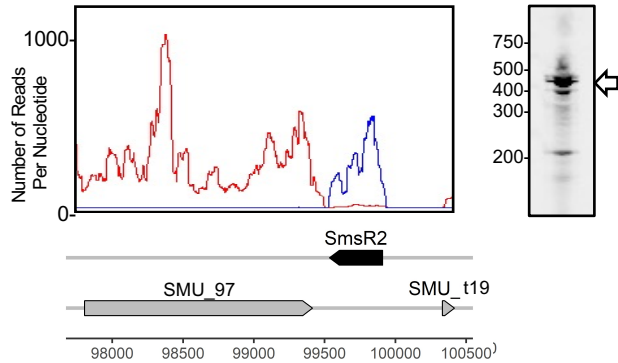

### SmsR3

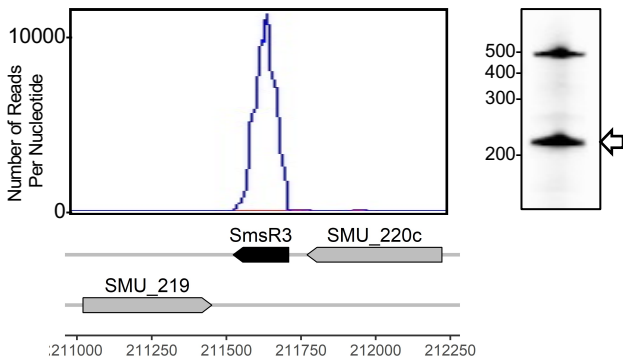

### SmsR4

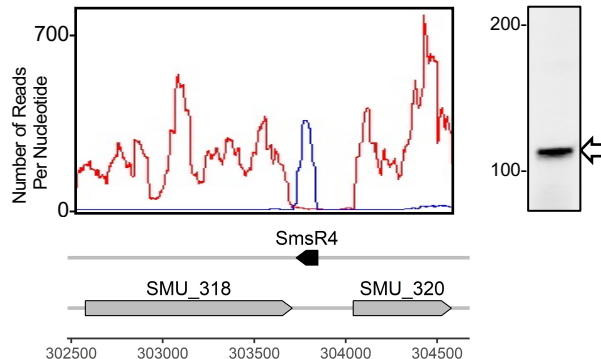

### SmsR5

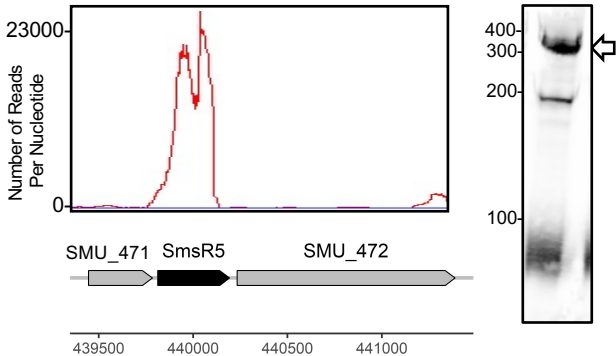

### SmsR6

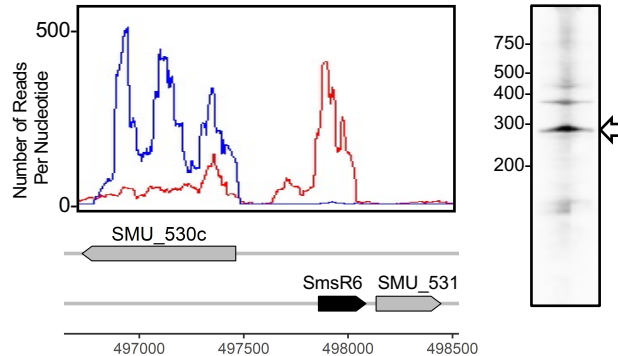

### SmsR7

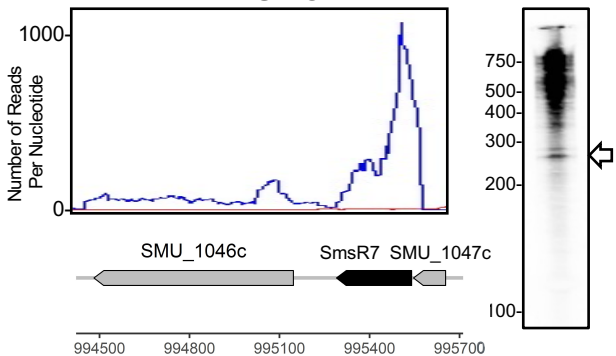

### SmsR8

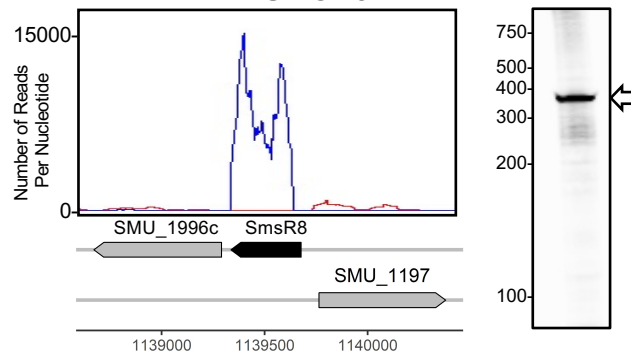

### SmsR12

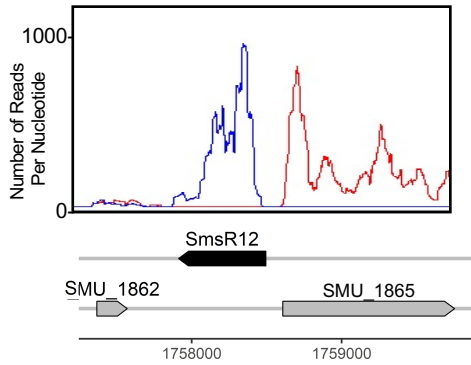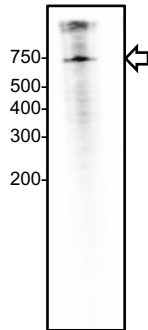

### SmsR14

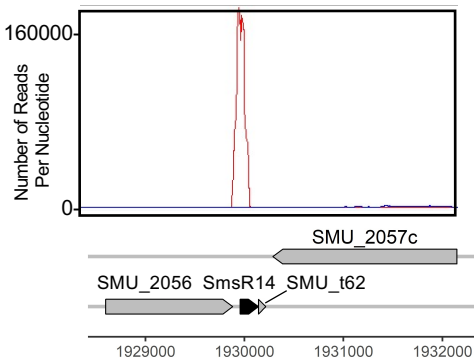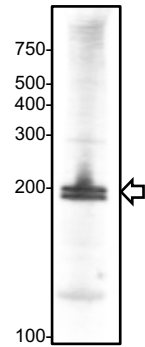

### SmsR16

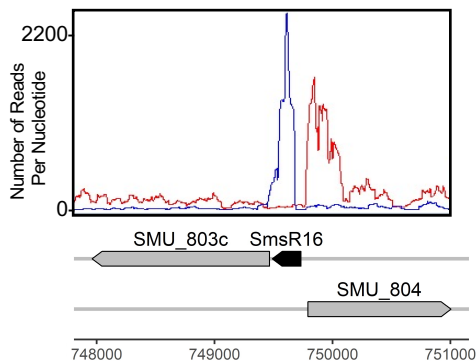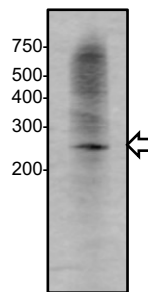

### SmsR18

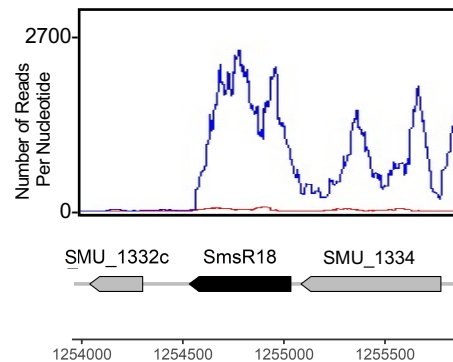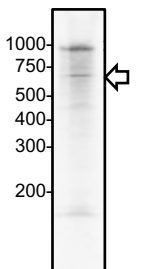

### SmsR19

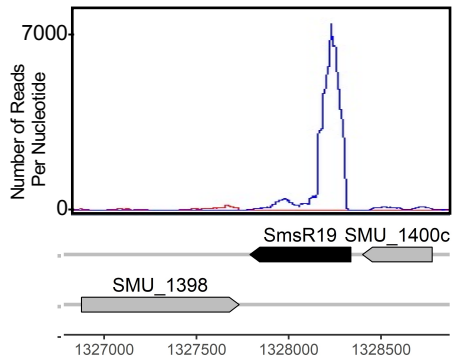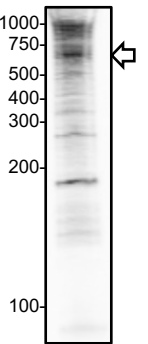

### SmsR20

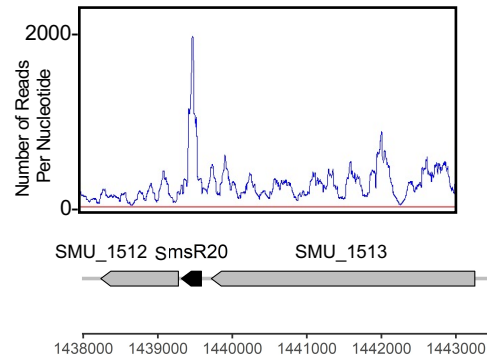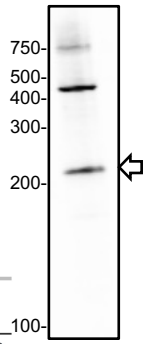

### SmsR22

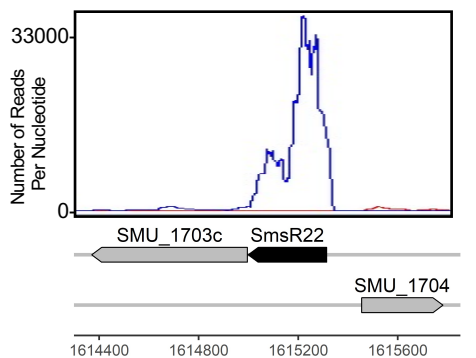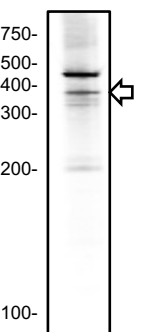

### sRNA Discovery Pipeline

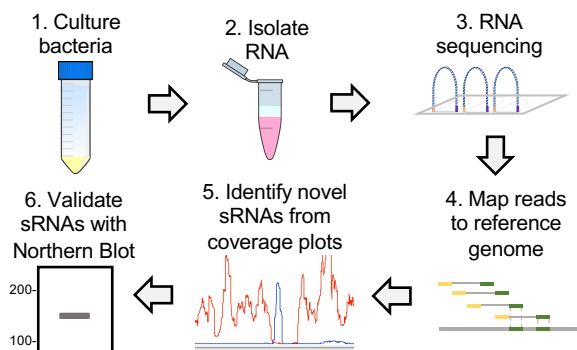

Types of Stress

■ Sugar-phosphate
□ Acid
■ Heat
■ Oxidative

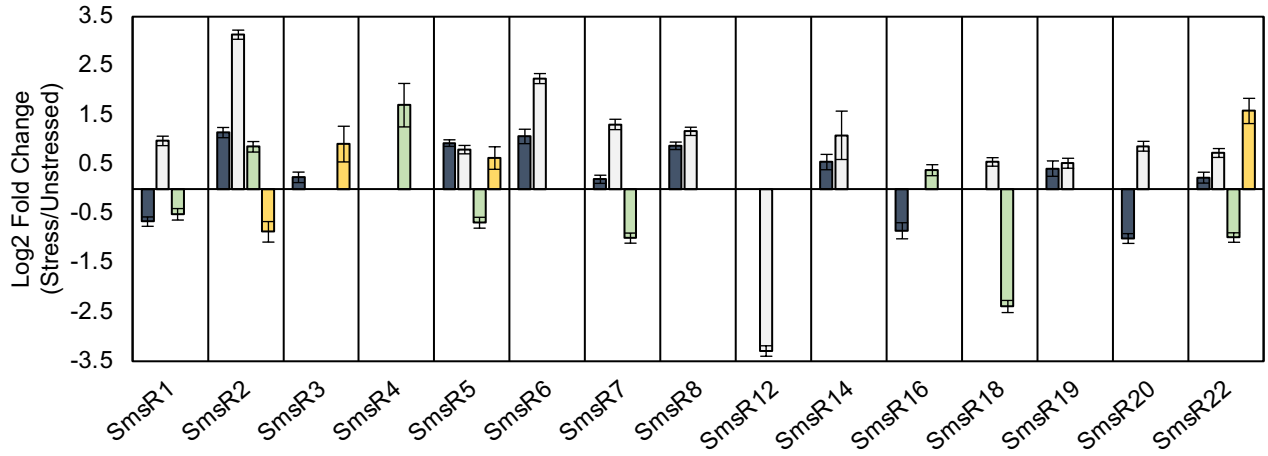

*Bacillus subtilis*

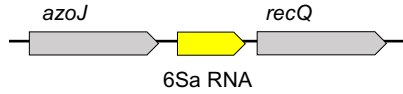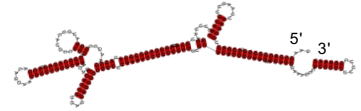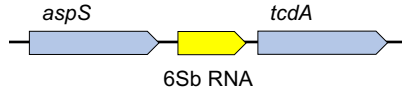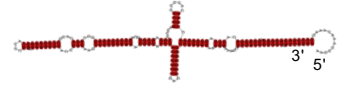

*Streptococcus mutans*

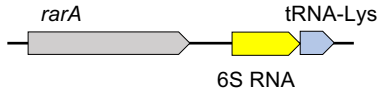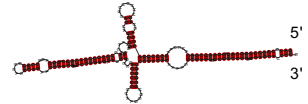

*Escherichia coli*

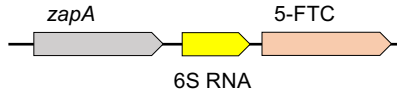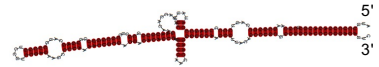

*Streptococcus mutans*

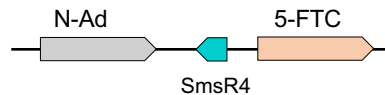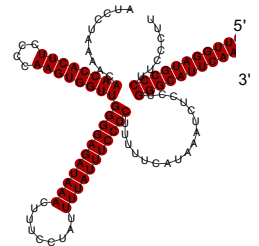

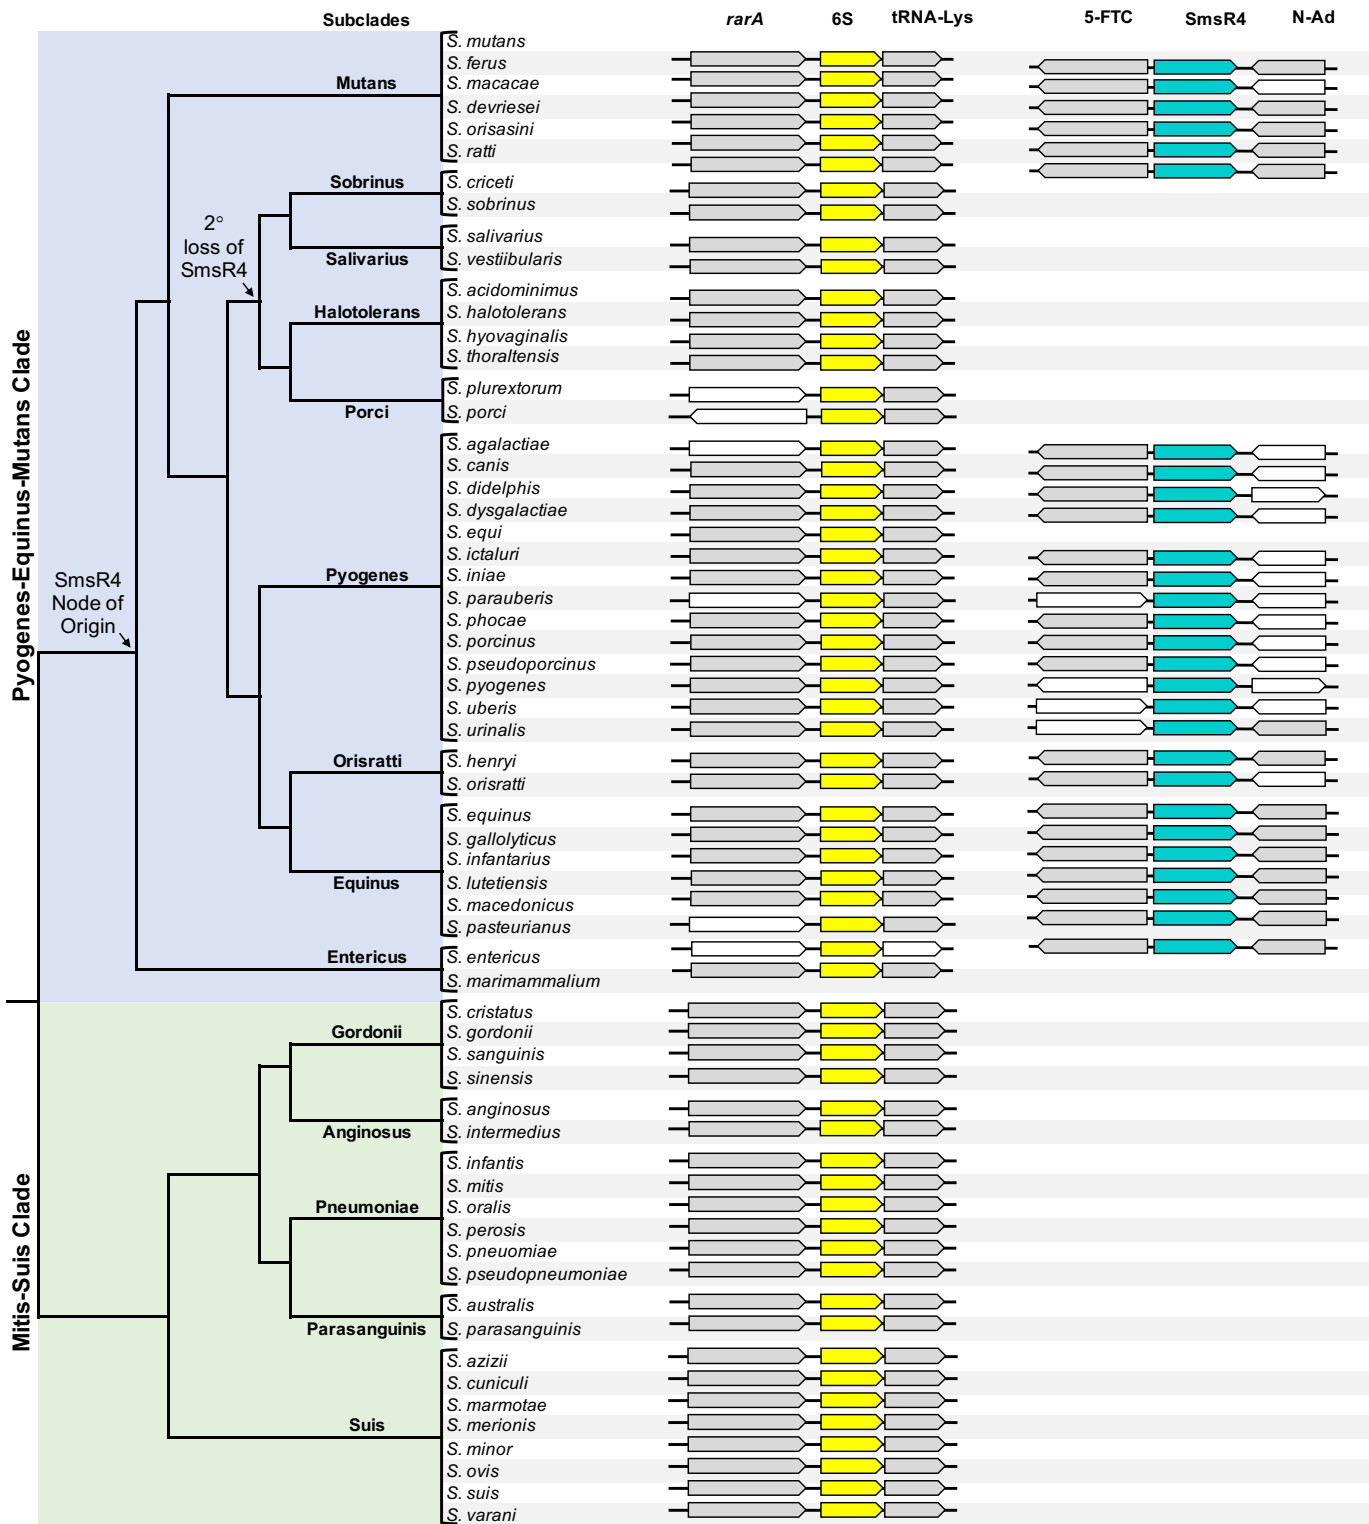



**BTR-G**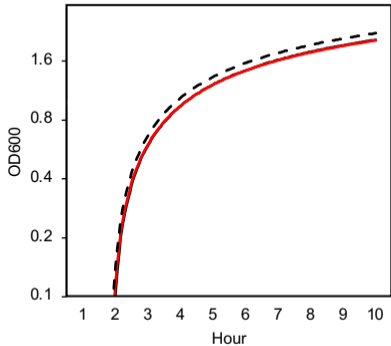**BTR-S**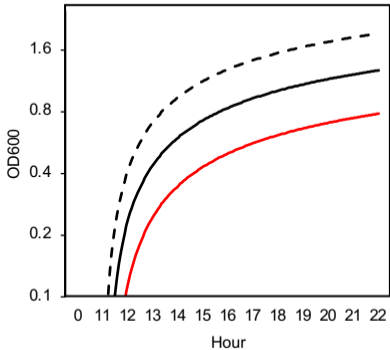

— WT    — DEL    - - COMP

**A**

|         |     |           |        |           |       |
|---------|-----|-----------|--------|-----------|-------|
| SmsR4   | 67  | CUUUUCCCC | U      | UUAUUUUAU | 47    |
|         |     |           |        |           |       |
| SMU_313 | -16 | GAAA      | AAGGGG | AAUAAA    | AUG 3 |

|         |     |              |              |       |
|---------|-----|--------------|--------------|-------|
| SmsR4   | 67  | CUUUUCCCCCUU | 55           |       |
|         |     |              |              |       |
| SMU_313 | -16 | GAAA         | AAGGGGAAUAAA | AUG 3 |

**B**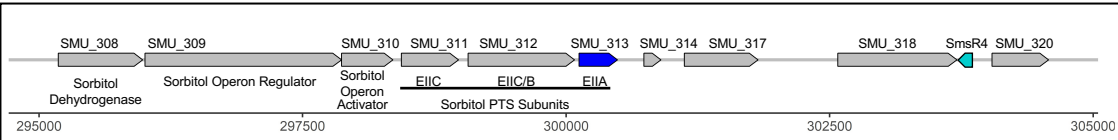

**A**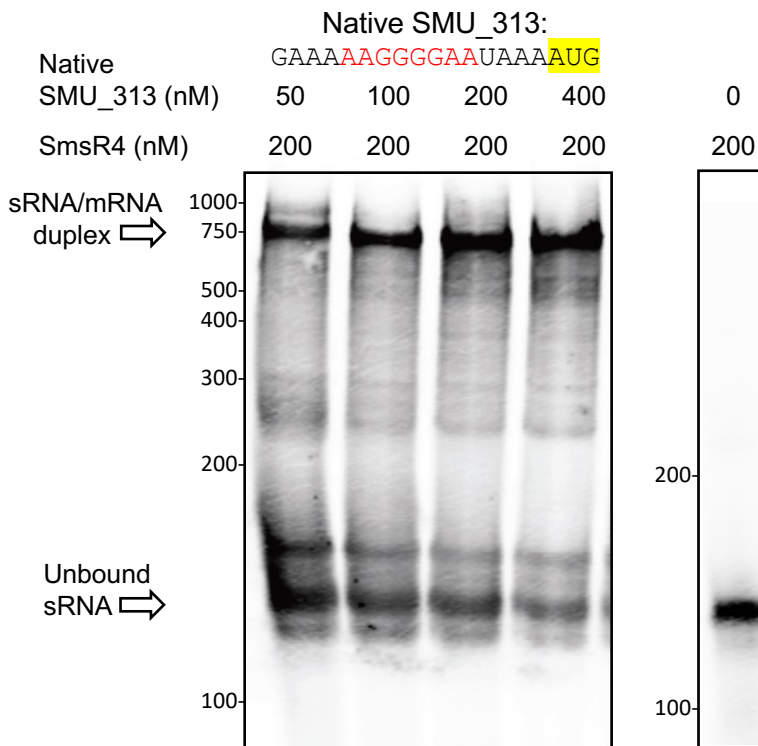**B**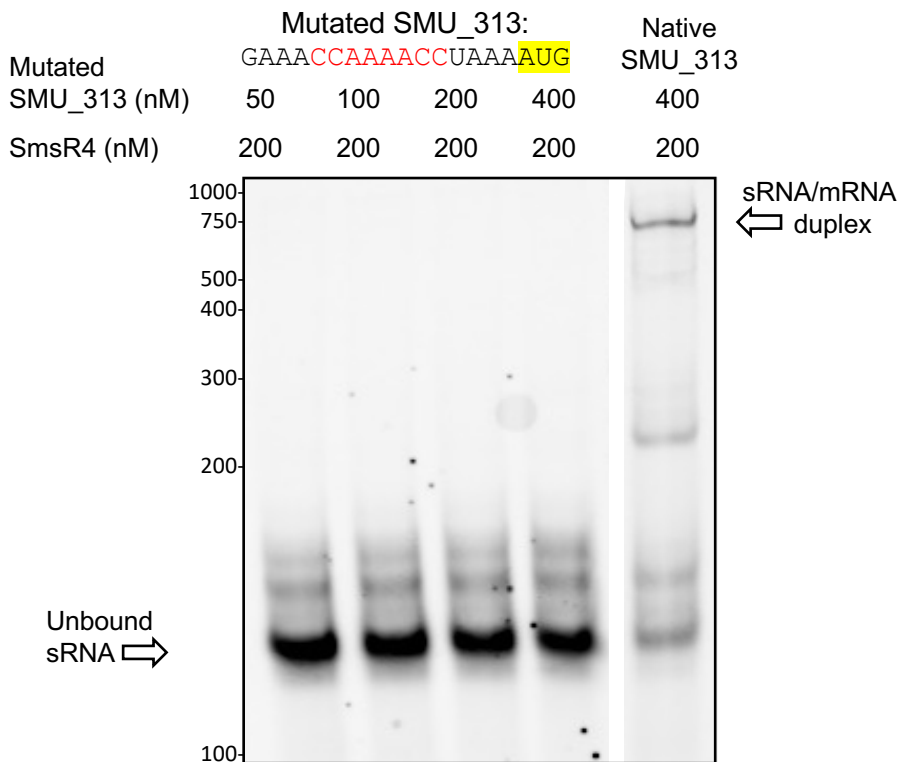

Source: https://www.biorxiv.org/content/10.1101/2021.11.16.468913v1.full.pdf
